# Supplementary material for: Networks of Neuronal Genes Affected by Common and Rare Variants in Autism Spectrum Disorders
Source: PubMed Central journal article supplement (PMC3297570; doi:10.1371/journal.pgen.1002556), 2012-03-08

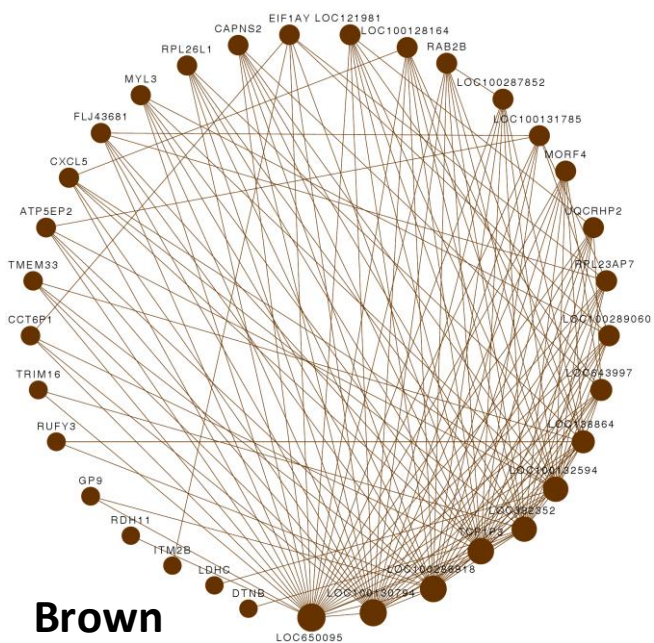

**Brown**

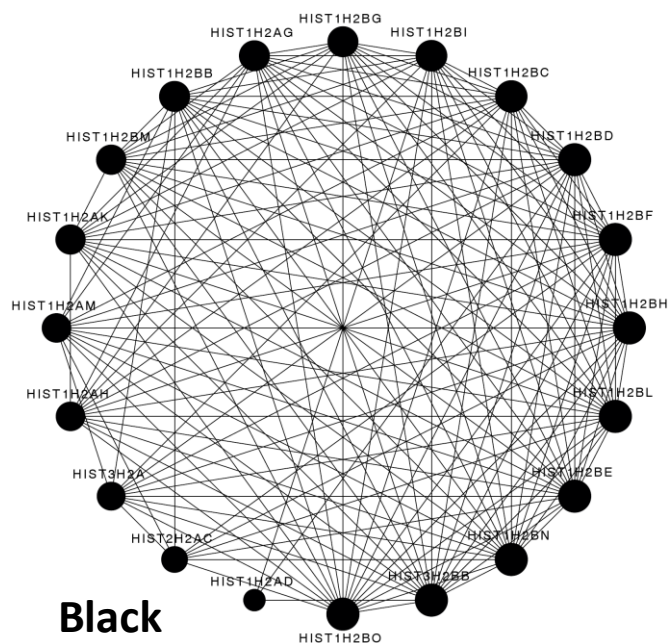

**Black**

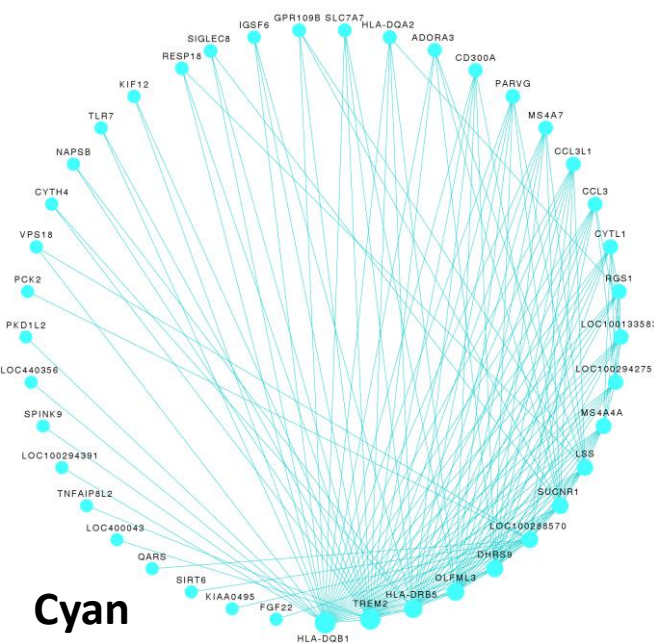

**Cyan**

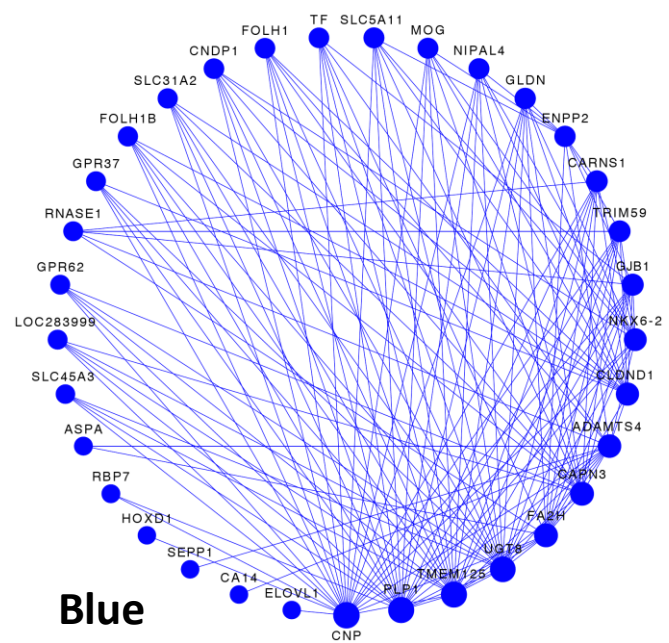

**Blue**



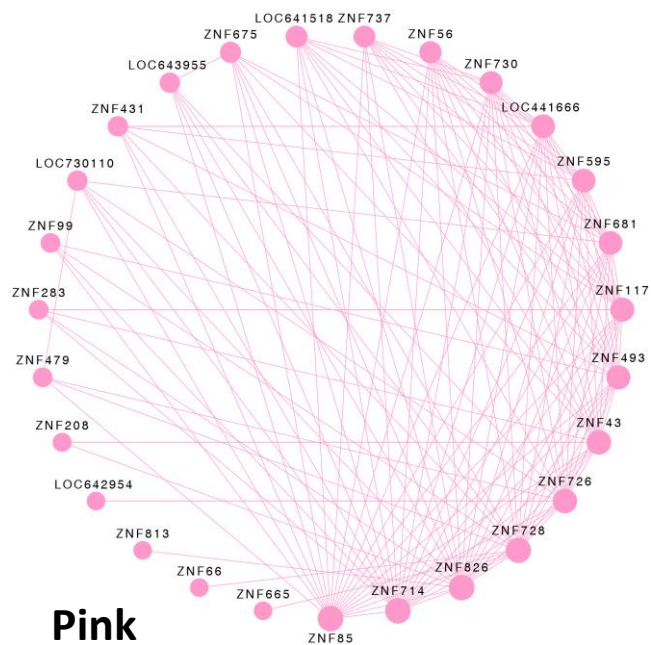

**Pink**

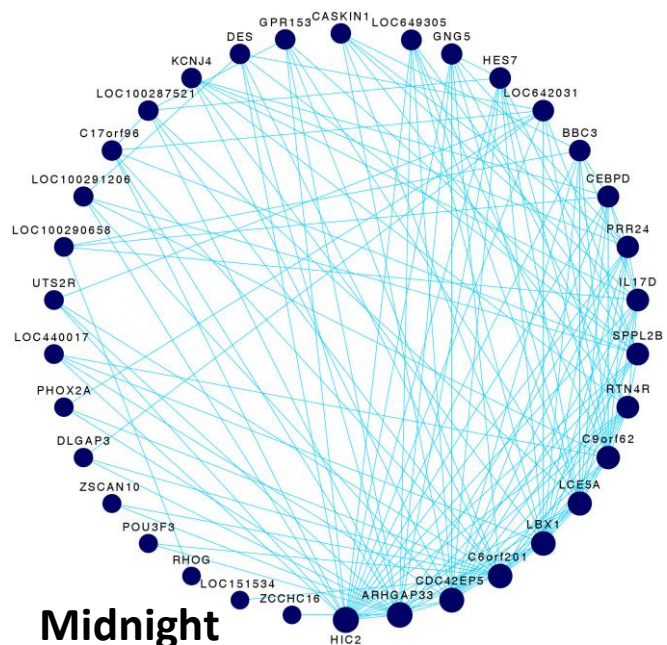

**Midnight-Blue**

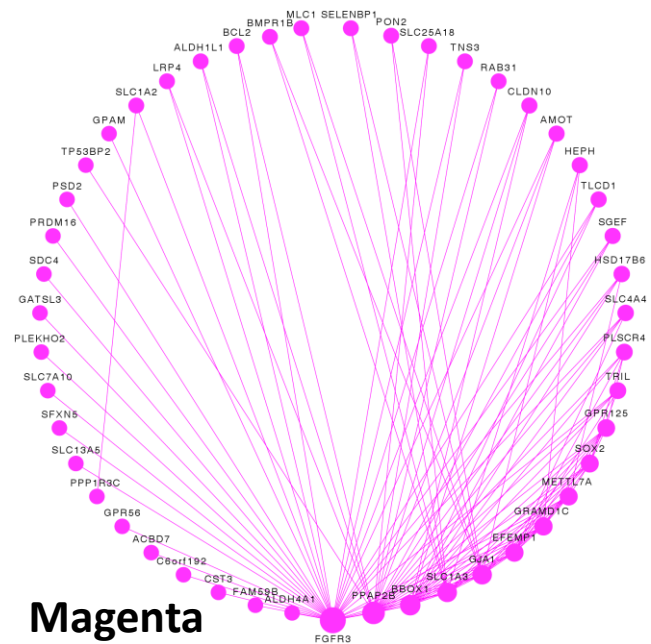

**Magenta**

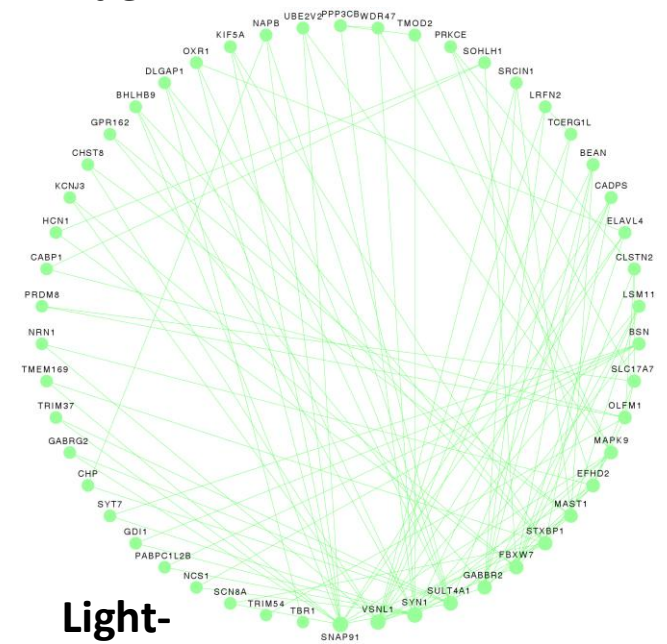

**Light-Green**

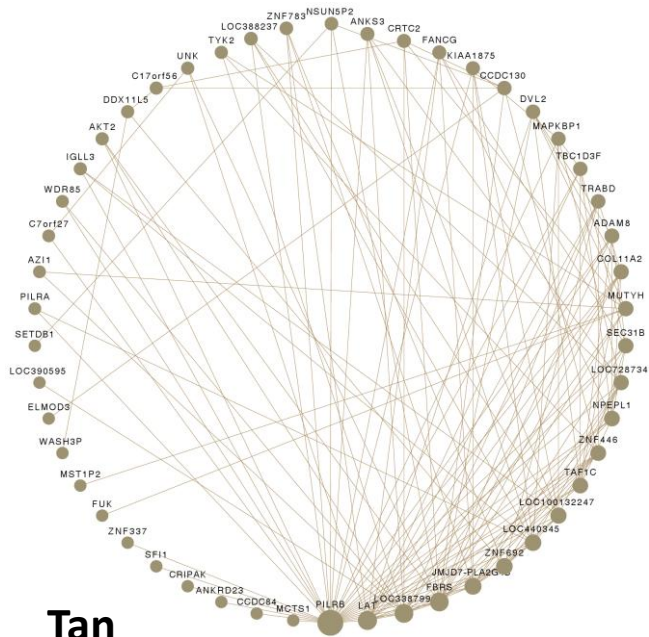

**Tan**

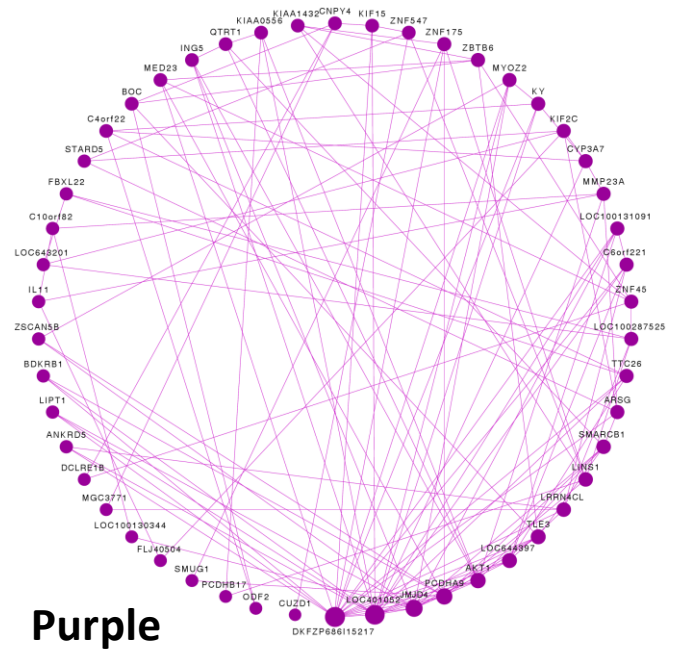

**Purple**

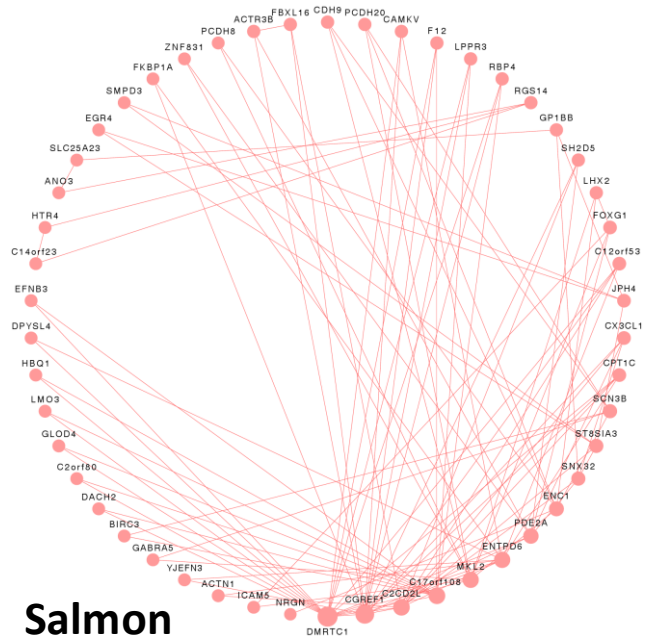

**Salmon**

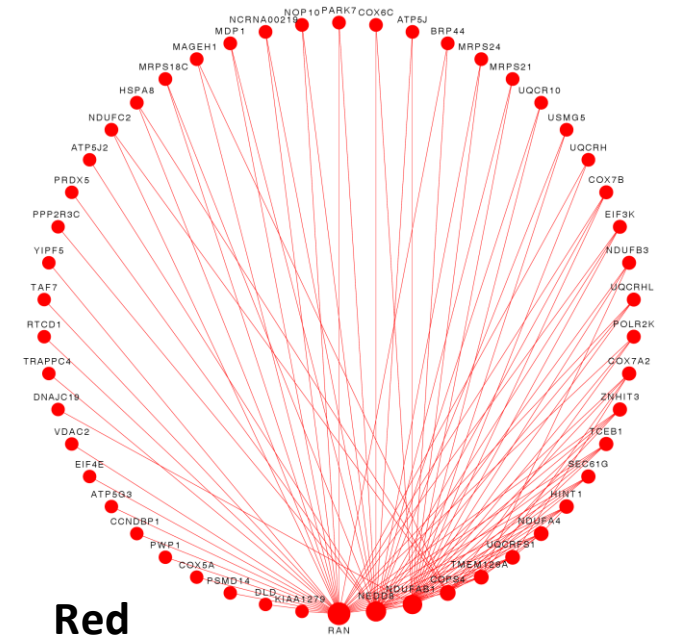

**Red**

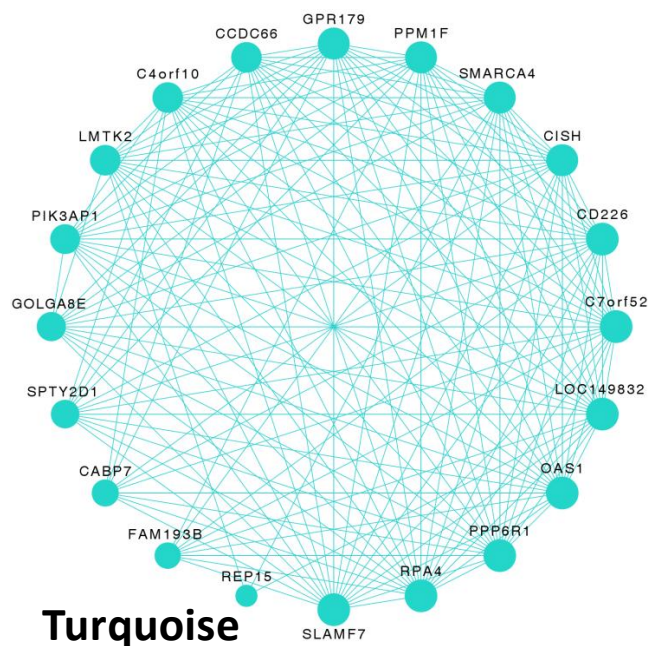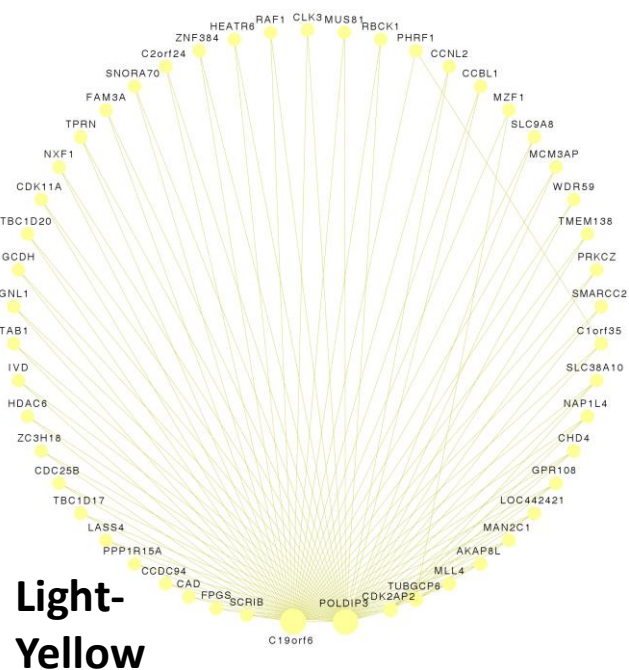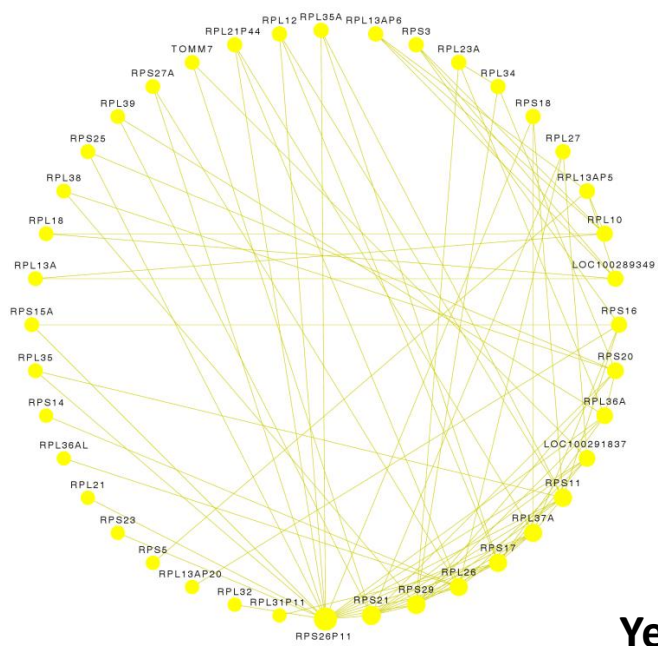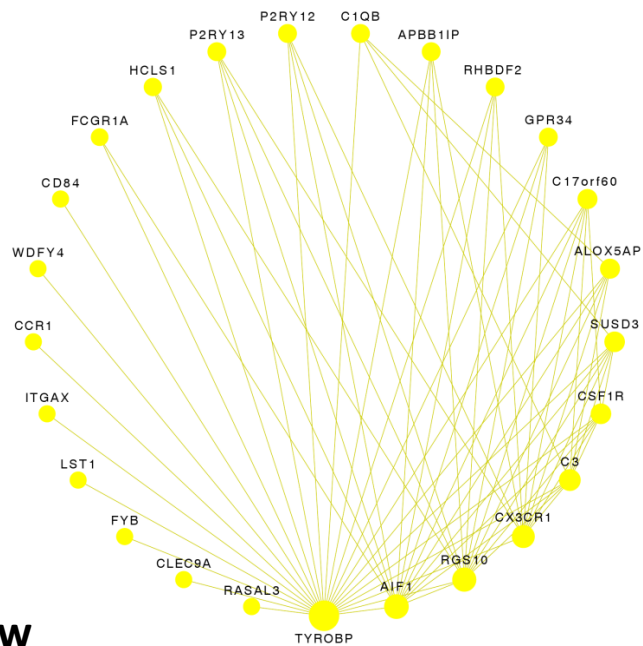

Supplement: pgen.1002556.s004.pdf [file pgen.1002556.s004.pdf]
