# Supplementary material for: Networks of Neuronal Genes Affected by Common and Rare Variants in Autism Spectrum Disorders
Source: PubMed Central journal article supplement (PMC3297570; doi:10.1371/journal.pgen.1002556), 2012-03-08

**A**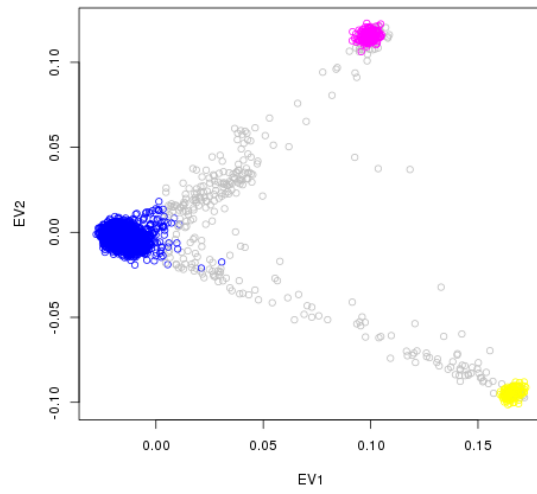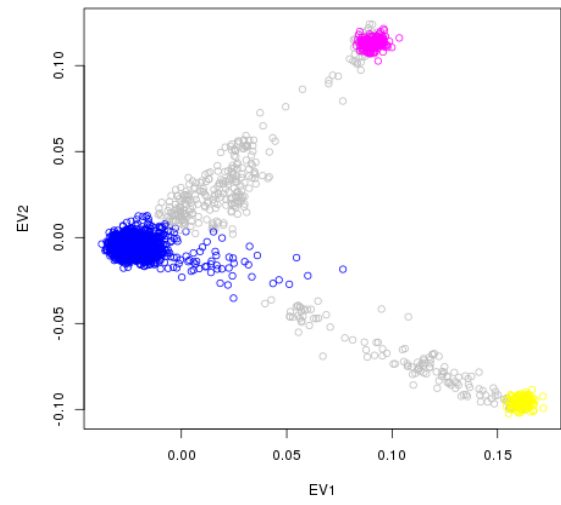**B**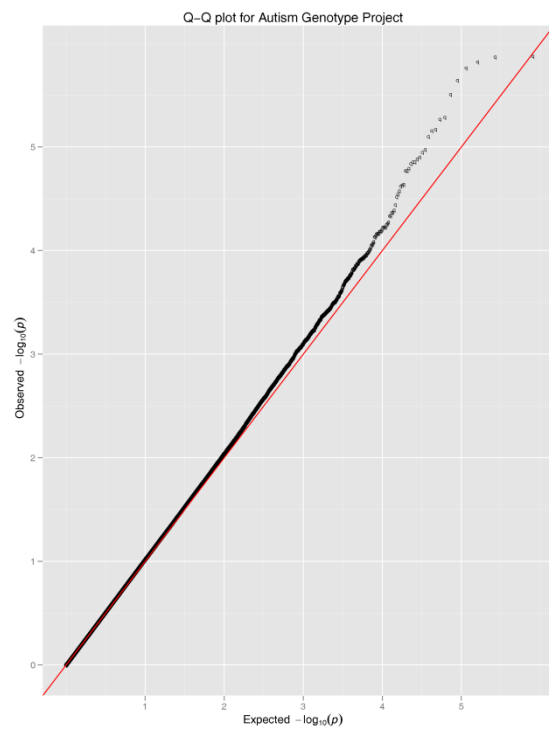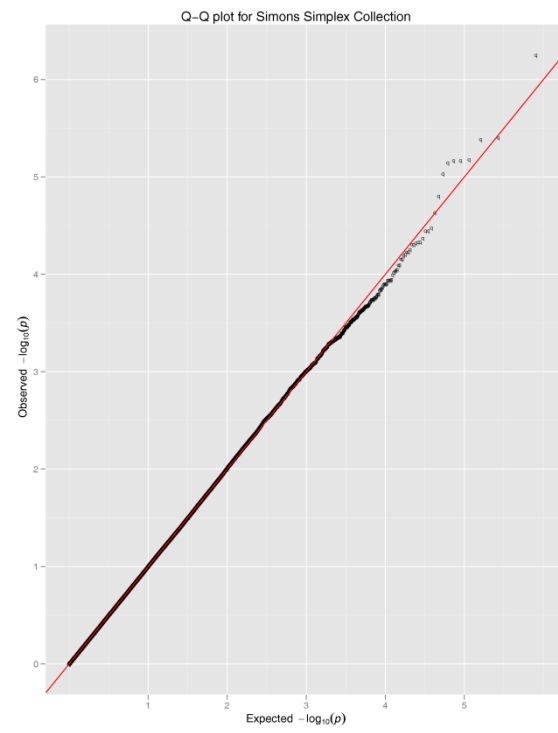

Supplement: pgen.1002556.s005.pdf [file pgen.1002556.s005.pdf]
